# Supplementary material
Source: PubMed Central journal article supplement (PMC5462028)

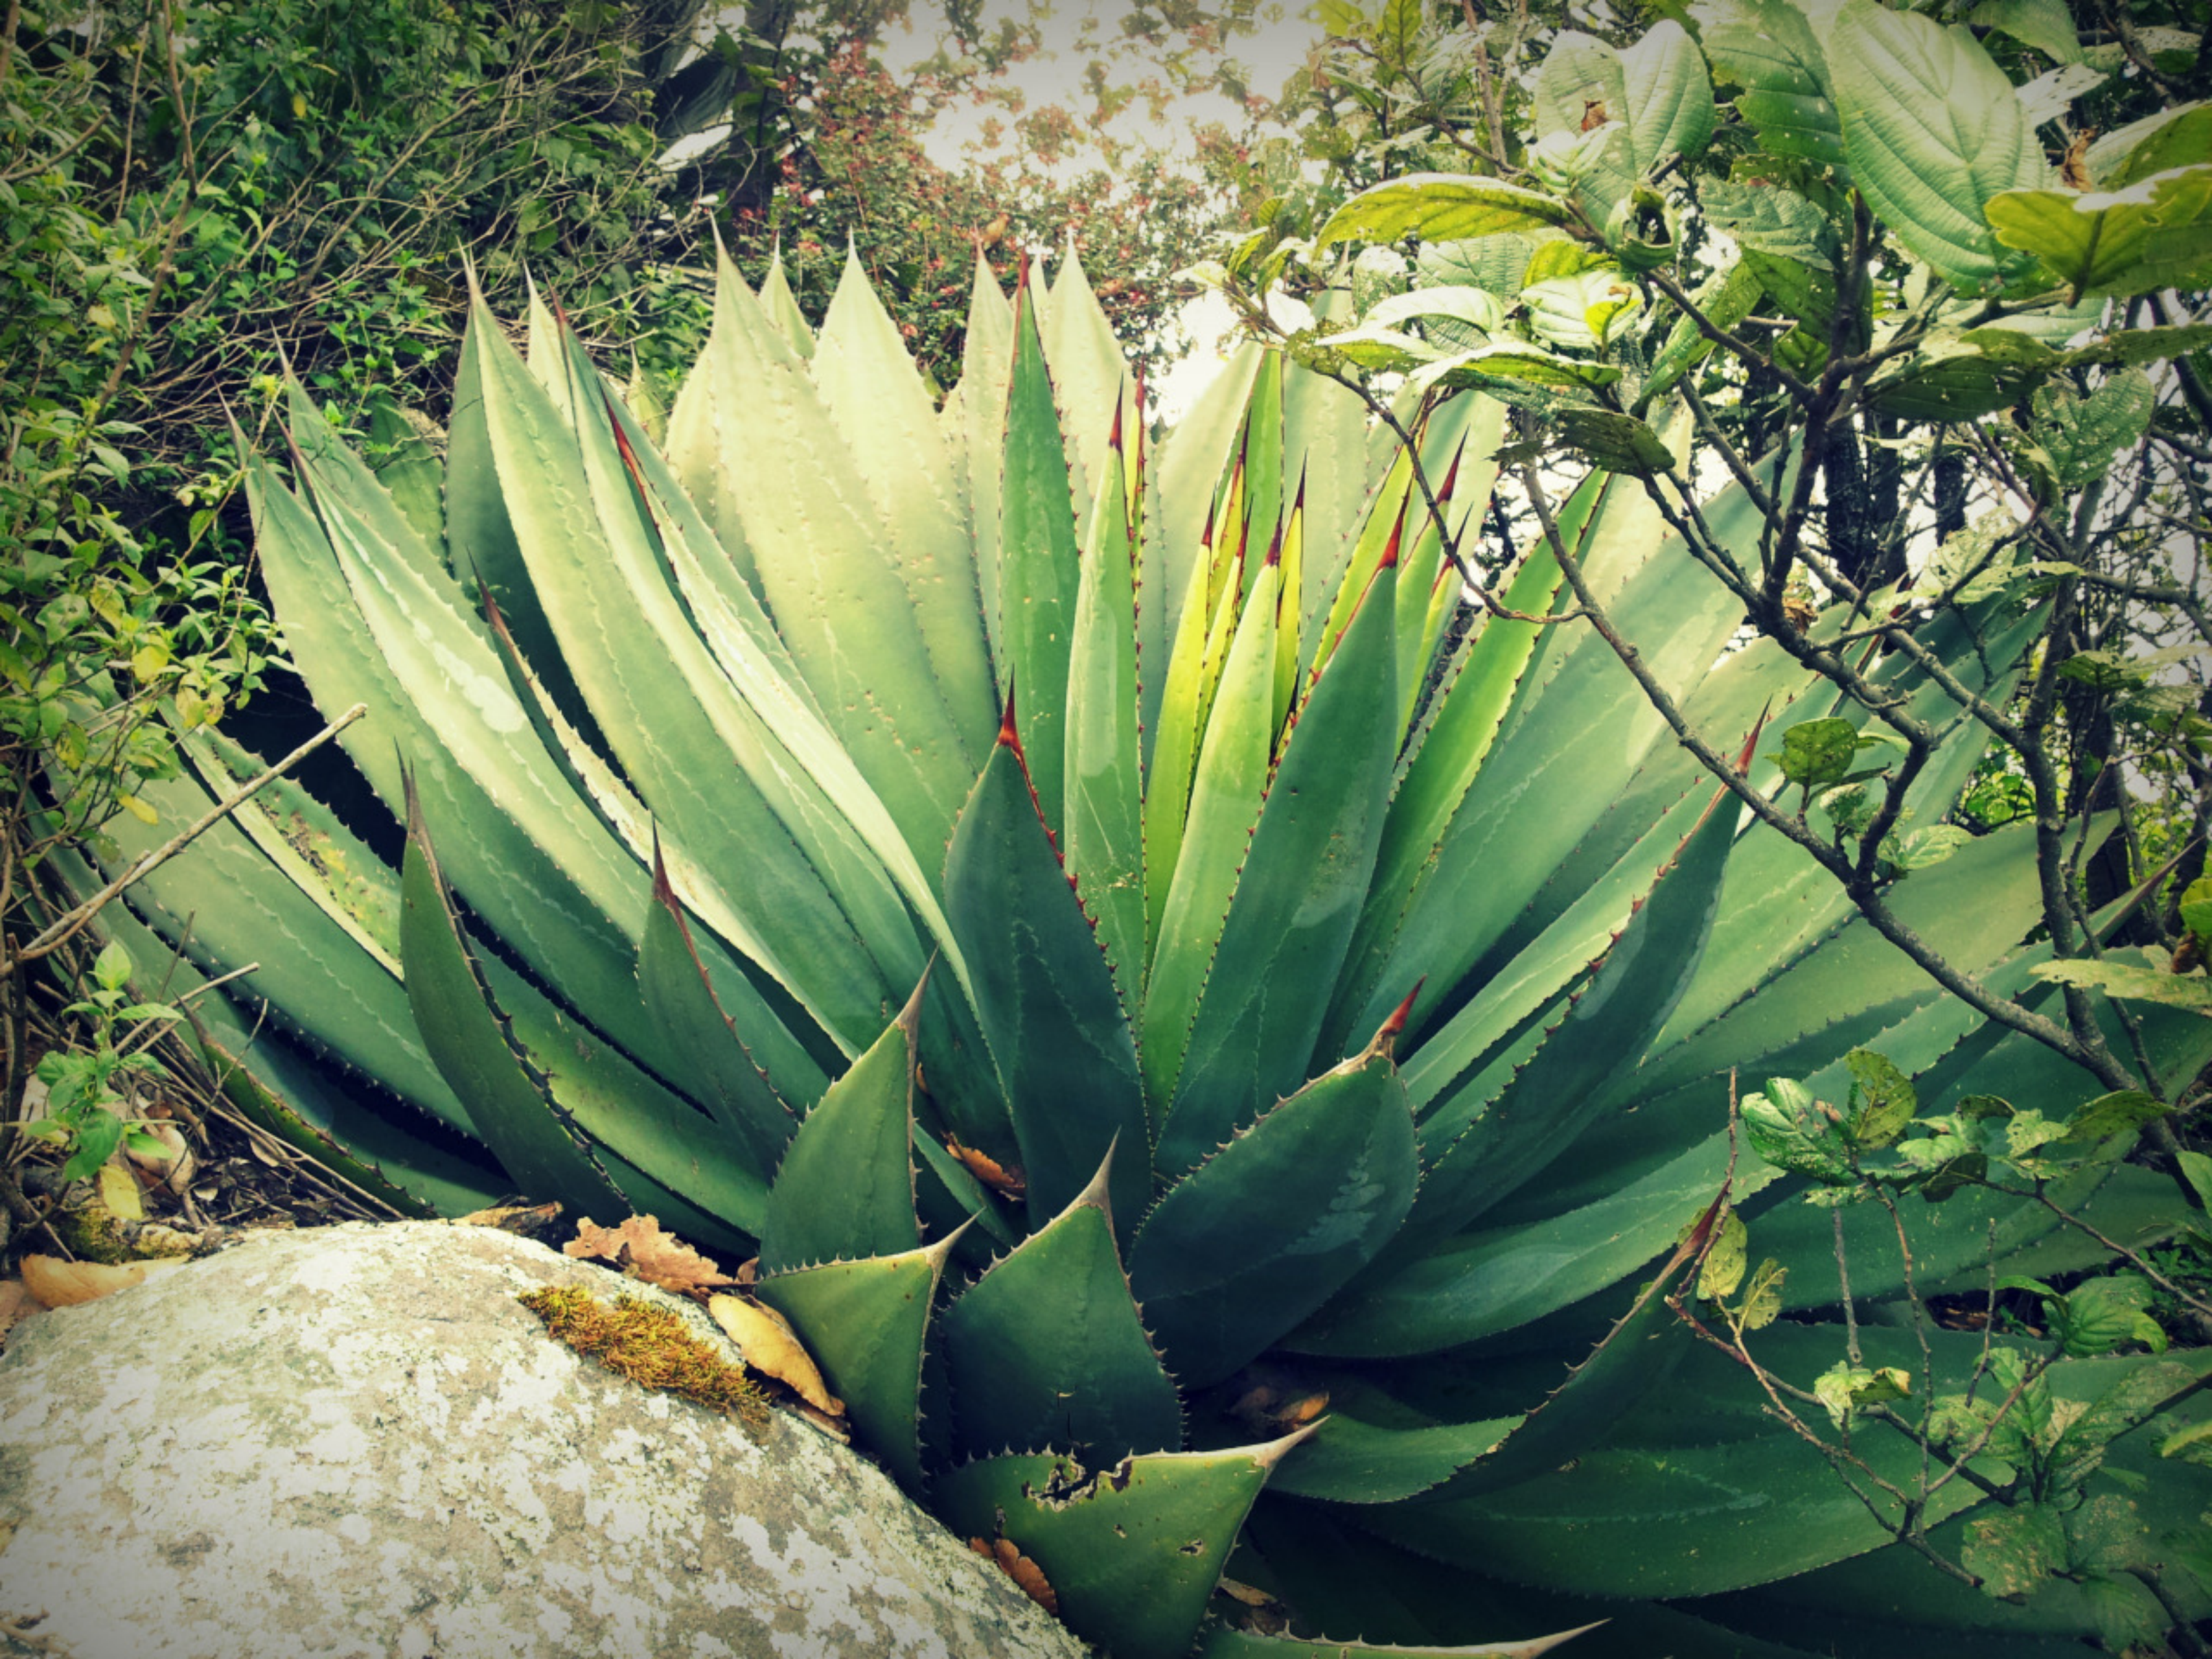

Supplement: supp_pp.17.00114_PP2017-00114R1_VTOC_Icon.pdf [file supp_pp.17.00114_PP2017-00114R1_VTOC_Icon.pdf]
